# Supplementary material for: Inhibition of oxidative stress by apocynin attenuated chronic obstructive pulmonary disease progression and vascular injury by cigarette smoke exposure
Source: PubMed Central journal article supplement (PMC10953324; doi:10.1111/bph.16068), 2023-03-31
Supplement: BPH-180-2018-s001.pdf [file BPH-180-2018-s001.pdf]

# Figure S1: 8-week CS

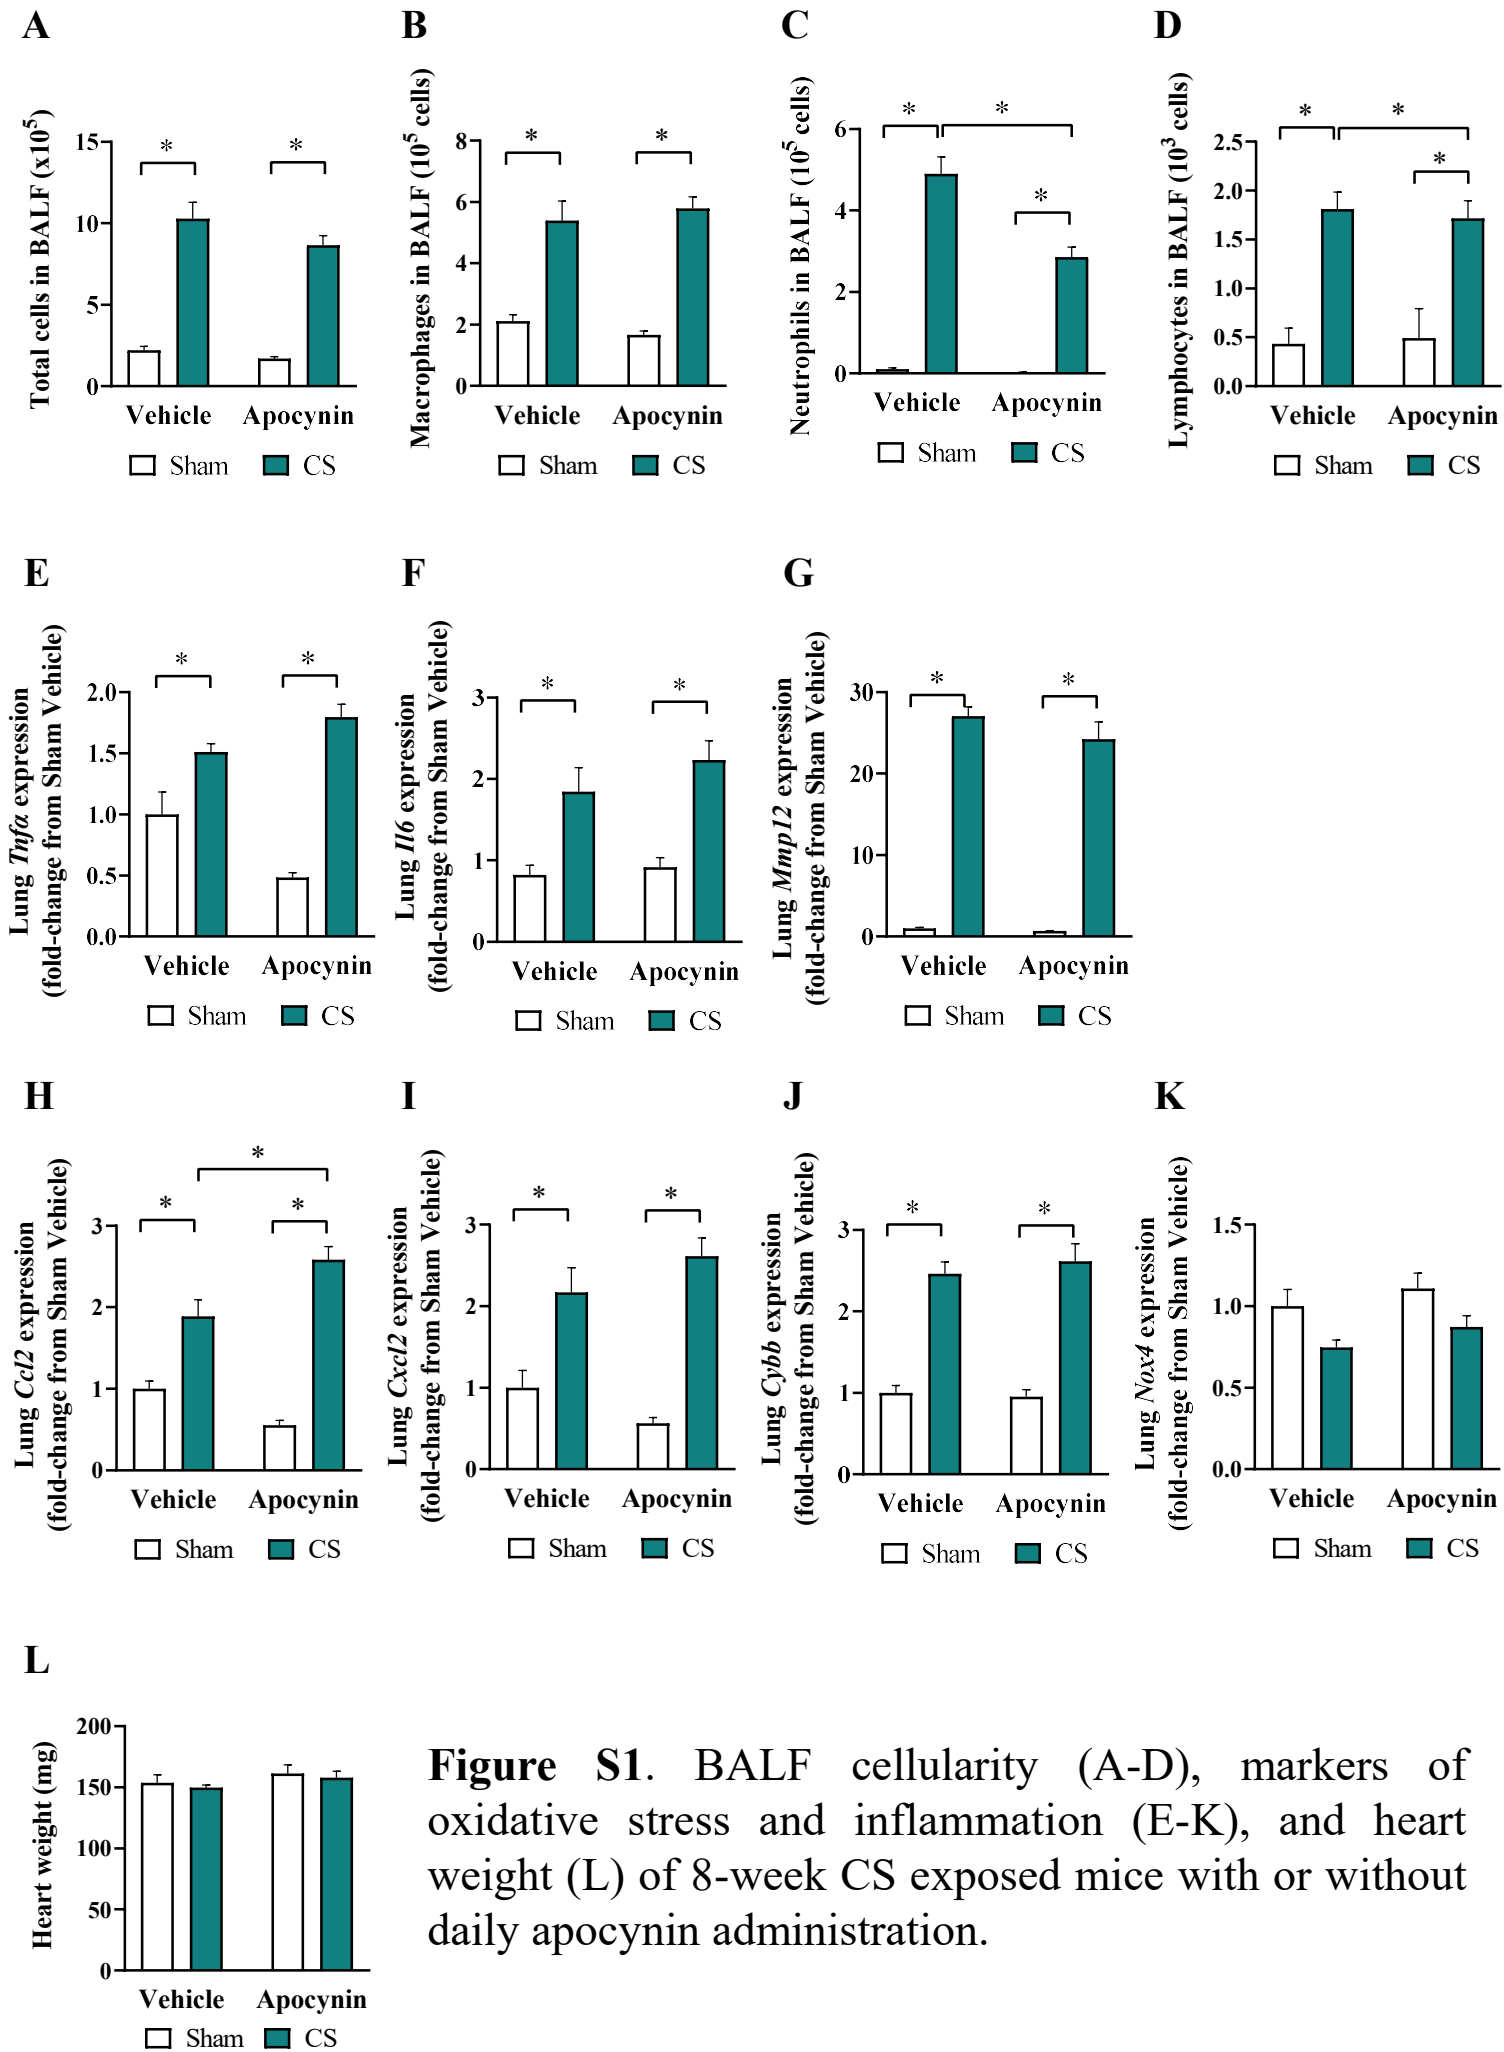

**Figure S1.** BALF cellularity (A-D), markers of oxidative stress and inflammation (E-K), and heart weight (L) of 8-week CS exposed mice with or without daily apocynin administration.

Figure S2: 24-week CS

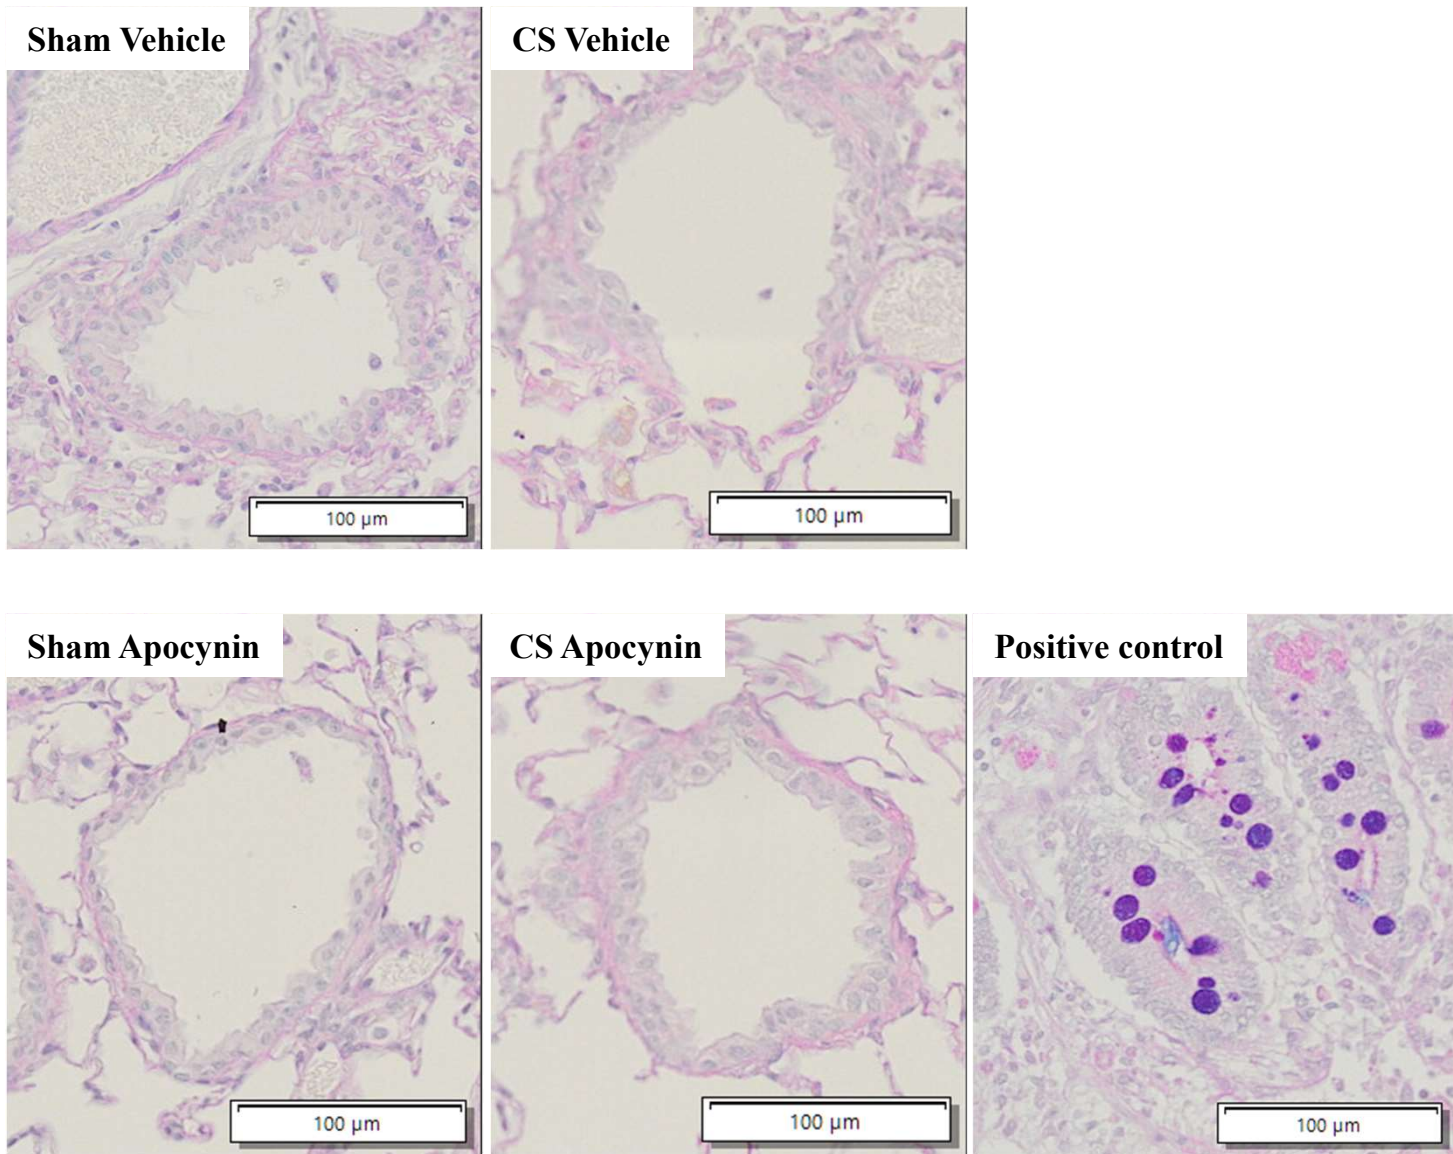

**Figure S2.** Representative images of lung sections stained with Alcian blue-periodic acid Schiff for mucus secretion. Kidney section was included as positive control.
